# Supplementary material for: SUMO Localizes to the Central Element of Synaptonemal Complex and Is Required for the Full Synapsis of Meiotic Chromosomes in Budding Yeast
Source: PubMed Central journal article supplement (PMC3789832; doi:10.1371/journal.pgen.1003837), 2013-10-03

Figure S4

**A**

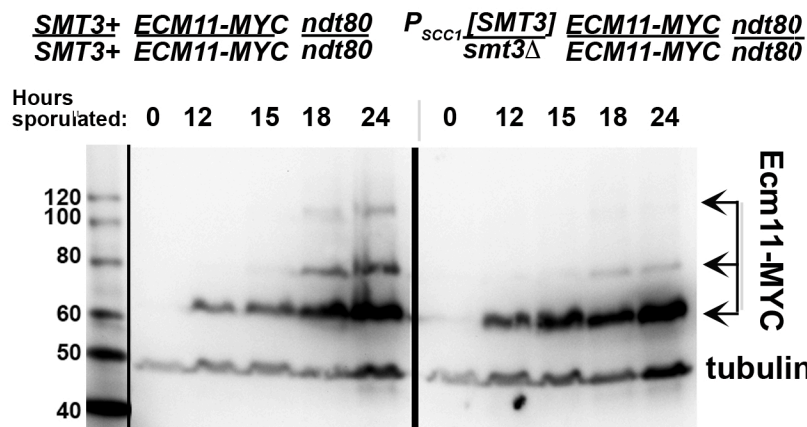

**B**

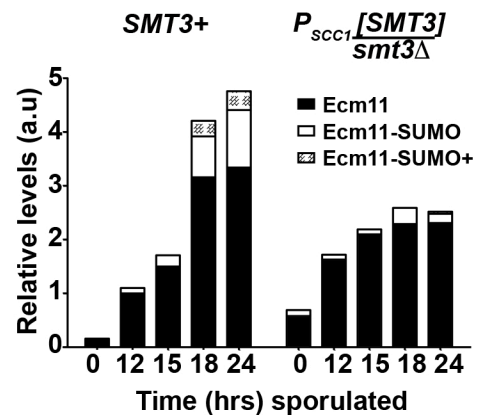

**C**

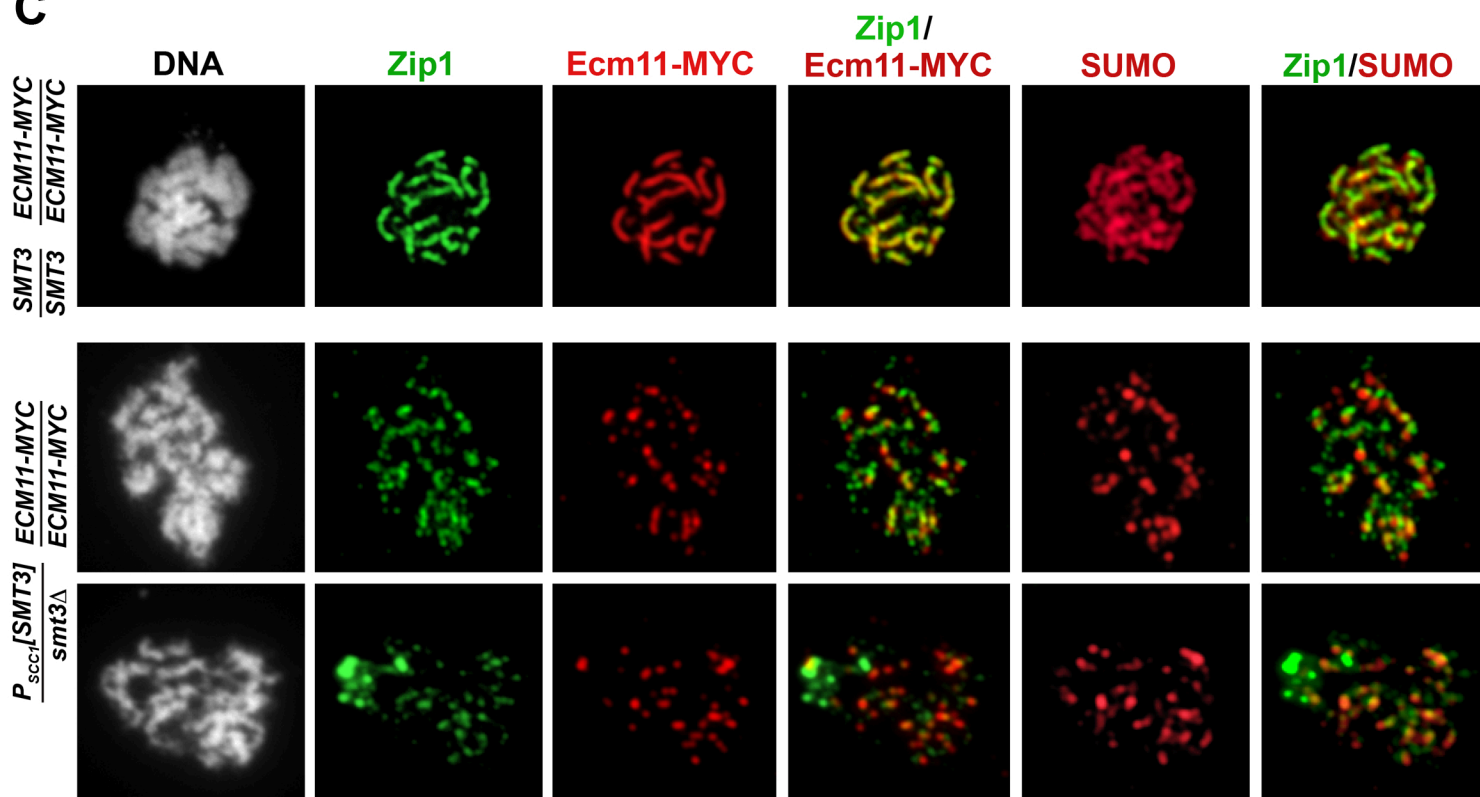

**D**

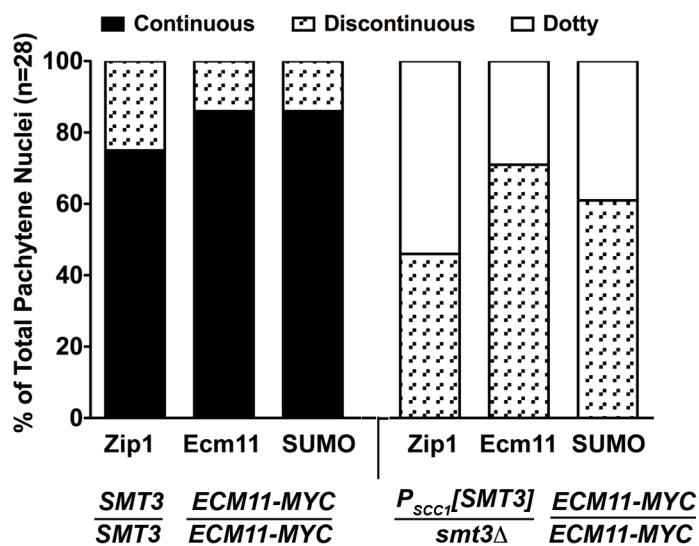

Supplement: pgen.1003837.s004.pdf [file pgen.1003837.s004.pdf]
