# Supplementary material for: SUMO Localizes to the Central Element of Synaptonemal Complex and Is Required for the Full Synapsis of Meiotic Chromosomes in Budding Yeast
Source: PubMed Central journal article supplement (PMC3789832; doi:10.1371/journal.pgen.1003837), 2013-10-03
Supplement: pgen.1003837.s011.pdf [file pgen.1003837.s011.pdf]

**Table S1. Strains used in this study**

| NAME   | GENOTYPE                                                                                                                                                                                                                                                                                    |
|--------|---------------------------------------------------------------------------------------------------------------------------------------------------------------------------------------------------------------------------------------------------------------------------------------------|
| PM89   | <u>MAT<math>\alpha</math> leu2-3,112 his4-260,519 lys2<math>\Delta</math>Nhe thr1-4 ade2-1 ura3-1 trp1-289</u><br><u>MAT<math>\alpha</math> leu2-3,112 his4-260,519 lys2<math>\Delta</math>Nhe thr1-4 ade2-1 ura3-1 trp1-289</u>                                                            |
| AM447  | PM89 <u>LYS2 ndt80<math>\Delta</math>::URA3</u><br><u>LYS2 ndt80<math>\Delta</math>::URA3</u>                                                                                                                                                                                               |
| LFT36  | PM89 <u>smt3<math>\Delta</math>::hphMX4</u><br><u>SMT3</u>                                                                                                                                                                                                                                  |
| LFT46  | LFT36 <u>kanMX4-P<sub>SCC1</sub>-SMT3</u><br><u>smt3<math>\Delta</math>::hphMX4</u>                                                                                                                                                                                                         |
| LY35   | PM89 <u>Zip3-MYC</u><br><u>ZIP3</u>                                                                                                                                                                                                                                                         |
| LFT62  | LY35 <u>kanMX4-P<sub>SCC1</sub>-SMT3</u><br><u>smt3<math>\Delta</math>::hphMX4</u>                                                                                                                                                                                                          |
| AM2712 | PM89 <u>ECM11-13MYC::kanMX4 ndt80<math>\Delta</math>::URA3</u><br><u>ECM11-13MYC::kanMX4 ndt80<math>\Delta</math>::URA3</u>                                                                                                                                                                 |
| LFT51  | PM89 <u>TRP1-P<sub>GALI</sub>-ZIP1 ura3::P<sub>GPD1</sub>-GAL4(848).ER::URA3 ndt80<math>\Delta</math>::LEU2</u><br><u>TRP1-P<sub>GALI</sub>-ZIP1 URA3 ndt80<math>\Delta</math>::LEU2</u>                                                                                                    |
| LFT65  | LFT51 <u>kanMX4-P<sub>SCC1</sub>-SMT3</u><br><u>smt3<math>\Delta</math>::hphMX4</u>                                                                                                                                                                                                         |
| AM2905 | PM89 <u>TRP1-P<sub>GALI</sub>-V5-SMT3 TRP1-P<sub>GALI</sub>-ZIP1-GFP ura3::P<sub>GPD1</sub>-GAL4(848).ER::URA3</u><br><u>SMT3 ZIP1 ura3::P<sub>GPD1</sub>-GAL4(848).ER::URA3</u><br><u>ndt80<math>\Delta</math>::LEU2</u><br><u>ndt80<math>\Delta</math>::LEU2</u>                          |
| AM2865 | PM89 <u>TRP1-P<sub>GALI</sub>-ECM11-13MYC::kanMX4 TRP1-P<sub>GALI</sub>-ZIP1-GFP</u><br><u>ECM11 ZIP1</u><br><u>ura3::P<sub>GPD1</sub>-GAL4(848).ER::URA3 ndt80<math>\Delta</math>::LEU2</u><br><u>ura3::P<sub>GPD1</sub>-GAL4(848).ER::URA3 ndt80<math>\Delta</math>::LEU2</u>             |
| AM2910 | PM89 <u>TRP1-P<sub>GALI</sub>-ecm11(K5R, K101R)-13MYC::kanMX4 TRP1-P<sub>GALI</sub>-ZIP1-GFP</u><br><u>ECM11 ZIP1</u><br><u>ura3::P<sub>GPD1</sub>-GAL4(848).ER::URA3 ndt80<math>\Delta</math>::LEU2</u><br><u>ura3::P<sub>GPD1</sub>-GAL4(848).ER::URA3 ndt80<math>\Delta</math>::LEU2</u> |
| SB14   | PM89 <u>ZIP1-GFP ndt80<math>\Delta</math>::LEU2</u><br><u>ZIP1-GFP ndt80<math>\Delta</math>::LEU2</u>                                                                                                                                                                                       |
| LFT37  | SB14 <u>smt3<math>\Delta</math>::hphMX4</u><br><u>SMT3</u>                                                                                                                                                                                                                                  |
| LFT47  | SB14 <u>kanMX4-P<sub>SCC1</sub>-SMT3</u><br><u>smt3<math>\Delta</math>::hphMX4</u>                                                                                                                                                                                                          |
| LFT80  | PM89 <u>pch2 <math>\Delta</math>::hphMX4</u><br><u>pch2 <math>\Delta</math>::hphMX4</u>                                                                                                                                                                                                     |
| LFT85  | LFT80 <u>kanMX4-P<sub>SCC1</sub>-SMT3</u><br><u>smt3<math>\Delta</math>::natMX4</u>                                                                                                                                                                                                         |
| AM1848 | PM89 <u>LYS2 spo11<math>\Delta</math>::ADE2 ndt80<math>\Delta</math>::LEU2</u><br><u>LYS2 spo11<math>\Delta</math>::ADE2 ndt80<math>\Delta</math>::LEU2</u>                                                                                                                                 |
| LFT61  | AM1848 <u>kanMX4-P<sub>SCC1</sub>-SMT3</u><br><u>smt3<math>\Delta</math>::hphMX4</u>                                                                                                                                                                                                        |
| K231   | PM89 <u>ECM11-13MYC::kanMX4 ndt80<math>\Delta</math>::LEU2</u><br><u>ECM11 ndt80<math>\Delta</math>::LEU2</u>                                                                                                                                                                               |
| K232   | PM89 <u>ecm11(K5R, K101R)-13MYC::kanMX4 ura3::P<sub>GPD1</sub>-GAL4(848).ER::URA3 ndt80<math>\Delta</math>::LEU2</u><br><u>ECM11 ura3-1 ndt80<math>\Delta</math>::LEU2</u>                                                                                                                  |

|               |                                                                                                                                                                          |
|---------------|--------------------------------------------------------------------------------------------------------------------------------------------------------------------------|
| <b>K172</b>   | LFT51 <u>ECM11-13MYC::kanMX4</u><br><u>ECM11-13MYC::kanMX4</u>                                                                                                           |
| <b>K163</b>   | LFT51 <u>ecm11(K5R, K101R)-13MYC::kanMX4</u><br><u>ecm11(K5R, K101R)-13MYC::kanMX4</u>                                                                                   |
| <b>K263</b>   | LFT51 <u>ECM11-13MYC::kanMX4</u> <u>LYS2</u><br><u>ECM11</u> <u>LYS2</u>                                                                                                 |
| <b>K235</b>   | LFT51 <u>ecm11(K5R, K101R)-13MYC::kanMX4</u><br><u>ECM11</u>                                                                                                             |
| <b>K260</b>   | K172 <u>kanMX4-P<sub>SCC1</sub>-SMT3</u><br><u>smt3Δ::hphMX4</u>                                                                                                         |
| <b>K262</b>   | K163 <u>kanMX4-P<sub>SCC1</sub>-SMT3</u><br><u>smt3Δ::hphMX4</u>                                                                                                         |
| <b>K230</b>   | K172 <u>ndt80Δ::LEU2</u><br><u>ndt80Δ::LEU2</u>                                                                                                                          |
| <b>K259</b>   | K230 <u>kanMX4-P<sub>SCC1</sub>-SMT3</u><br><u>smt3Δ::hphMX4</u>                                                                                                         |
| <b>K189</b>   | PM89 <u>his4-260,519</u> <u>CEN3</u> <u>RAD18</u> <u>TetO:THR1(@215,000 of IV)</u> <u>LacO-CEN4-LEU2</u><br><u>HIS4</u> <u>HYG@CEN3</u> <u>ADE2@RAD18</u> <u>CEN4</u>    |
| <b>K188</b>   | K189 <u>kanMX4-P<sub>SCC1</sub>-SMT3</u><br><u>kanMX4-P<sub>SCC1</sub>-SMT3</u>                                                                                          |
| <b>K197</b>   | K189 <u>smt3Δ::natMX4</u><br><u>SMT3</u>                                                                                                                                 |
| <b>K196</b>   | K189 <u>kanMX4-P<sub>SCC1</sub>-SMT3</u><br><u>smt3Δ::natMX4</u>                                                                                                         |
| <b>K167</b>   | K189 <u>pch2::TRP1</u><br><u>pch2::TRP1</u>                                                                                                                              |
| <b>K191</b>   | K167 <u>kanMX4-P<sub>SCC1</sub>-SMT3</u><br><u>kanMX4-P<sub>SCC1</sub>-SMT3</u>                                                                                          |
| <b>K325</b>   | K167 <u>smt3Δ::natMX4</u><br><u>SMT3</u>                                                                                                                                 |
| <b>K198</b>   | K189 <u>pch2::TRP1</u> <u>kanMX4-P<sub>SCC1</sub>-SMT3</u><br><u>pch2::TRP1</u> <u>smt3Δ::natMX4</u>                                                                     |
| <b>K223</b>   | K167 <u>PCH2</u> <u>kanMX4-P<sub>SCC1</sub>-SMT3</u><br><u>PCH2</u> <u>smt3Δ::natMX4</u>                                                                                 |
| <b>AM2892</b> | PM89 <u>ECM11-13MYC::kanMX4</u> <u>ndt80Δ::LEU2</u><br><u>ECM11+</u> <u>ndt80Δ::LEU2</u>                                                                                 |
| <b>SM170</b>  | PM89 <u>TRP1-P<sub>GAL1</sub>-ZIP1</u> <u>ura3::P<sub>GPD1</sub>-GAL4(848).ER::URA3</u> <u>ndt80Δ::LEU2</u><br><u>ZIP1-YFP</u> <u>URA3</u> <u>ndt80Δ::LEU2</u>           |
| <b>SM176</b>  | PM89 <u>ZIP1-YFP</u> <u>ndt80Δ::LEU2</u><br><u>ZIP1-YFP</u> <u>ndt80Δ::LEU2</u>                                                                                          |
| <b>SM224</b>  | PM89 <u>ZIP1-YFP</u> <u>2x[ZIP1-YFP]@LEU2</u> <u>ndt80Δ::HYG</u><br><u>ZIP1-YFP</u> <u>leu2</u> <u>ndt80Δ::HYG</u>                                                       |
| <b>LFT117</b> | PM89 <u>ZIP1-YFP</u> <u>ECM11-13MYC::kanMX4</u> <u>ndt80Δ::LEU2</u><br><u>TRP1-P<sub>GAL1</sub>-ZIP1</u> <u>ECM11-13MYC::kanMX4</u> <u>ndt80Δ::LEU2</u>                  |
| <b>LFT119</b> | PM89 <u>ZIP1-YFP</u> <u>2x[ZIP1-YFP]@LEU2</u> <u>ECM11-13MYC::kanMX4</u> <u>ndt80Δ::HYG</u><br><u>ZIP1-YFP</u> <u>leu2</u> <u>ECM11-13MYC::kanMX4</u> <u>ndt80Δ::HYG</u> |
